# Supplementary material
Source: PubMed Central journal article supplement (PMC4828266)

**SUPPLEMENTAL FIGURES** Baker-Groberg *et al.*

**Supplemental Figure 1. Adult venous and finger prick blood platelet activation.** Percent of platelets from venous blood and from finger prick (capillary bed) blood positive for PAC-1-FITC (A) and CD62P-APC (B) in response to thrombin receptor activator peptide 6 (TRAP-6; 10  $\mu$ M), collagen related peptide (CRP; 10  $\mu$ g/mL), adenosine 5'-diphosphate (ADP; 10  $\mu$ M), U46619 (10  $\mu$ M), ADP+U46619 (10  $\mu$ M), epinephrine (10  $\mu$ M), calcium ionophore A23187 (10  $\mu$ M), rhodocytin (300 nM), or vehicle treatment. Data are represented as mean  $\pm$  SEM. Venous blood and finger prick blood samples were from the same donor;  $N_{vein} = 4$  and  $N_{capillary} = 4$ .

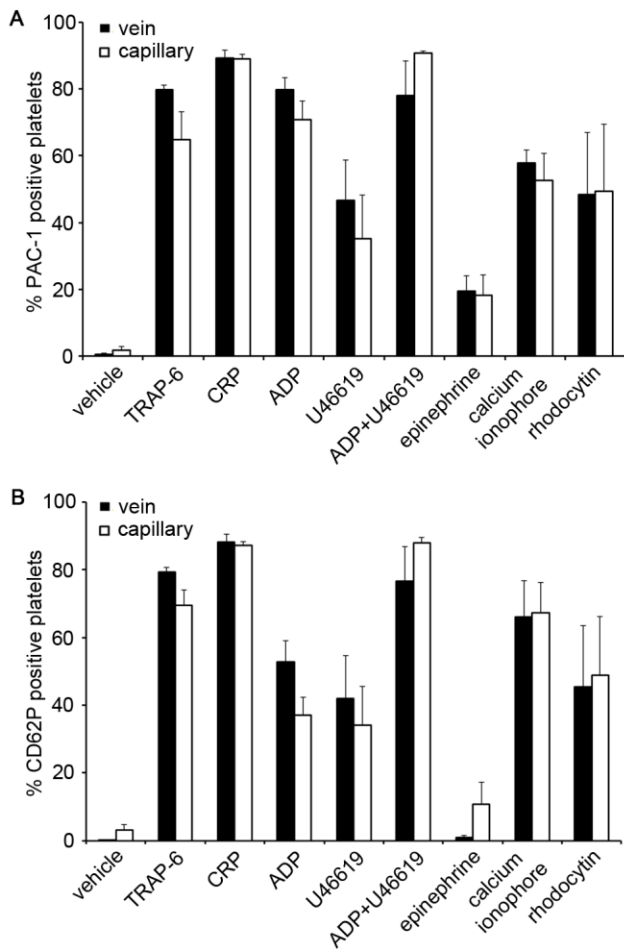

Supplement: NIHMS754070-supplement-Supp_Fig_S1.pdf [file NIHMS754070-supplement-Supp_Fig_S1.pdf]
